# Supplementary material for: The role of hydrogen in heavy transport to operate within planetary boundaries
Source: Royal Society of Chemistry journal article supplement (doi:10.1039/d1se00790d), 2021-01-01
Supplement: d1se00790d1.pdf [file d1se00790d1.pdf]

## Appendix

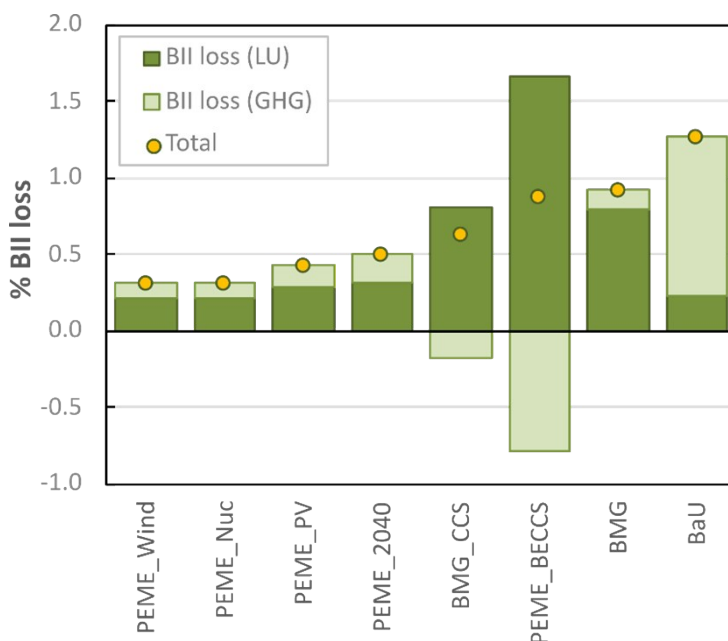

**Figure A1** Contribution of the environmental stressors to the PB of biosphere integrity. The bars are arranged in ascending order of total impact. (BII: biodiversity intactness index; LU: land use stressor; GHG: greenhouse gas emissions stressor).

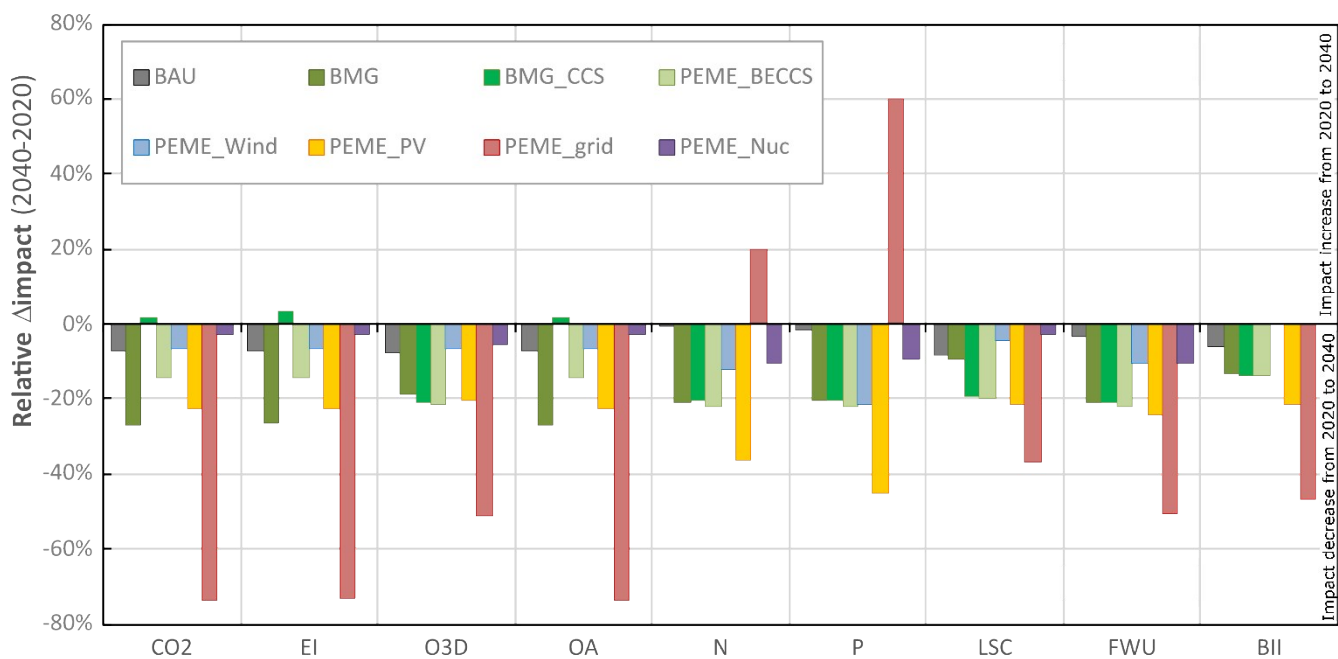

**Figure A2** Relative impact variation between 2040 and 2020 scenarios. Negative values denote better performance for the 2040 scenario under the specific control variables of the PBs. (CO<sub>2</sub>: Atmospheric CO<sub>2</sub> concentration; EI: Energy imbalance at the top of atmosphere; O<sub>3</sub>D: Stratospheric ozone depletion; OA: Ocean acidification; P: Biogeochemical phosphorus flow, global; N: Biogeochemical nitrogen flow, global; LSC: Land-system change, global; FWU: Freshwater use, global; BII: Biosphere integrity).
